# Supplementary material for: The international primary ciliary dyskinesia cohort (iPCD Cohort): methods and first results
Source: PubMed Central journal article supplement — Eur Respir J. 2017 Jan 5;49(1):1601181. doi: 10.1183/13993003.01181-2016 (PMC5298195; doi:10.1183/13993003.01181-2016), 2017-01-05
Supplement: ERJ-01181-2016_Supplement1.pdf [file ERJ-01181-2016_Supplement1.pdf]

# The International Primary Ciliary Dyskinesia (iPCD) Cohort: methods and first results

-Online supplement

## Data protection/ Ethics

In most participating countries, research laws do not require obtaining patient informed consent for observational retrospectively collected anonymised data. However, even in these countries, PIs have received already ethics approval and informed consent for collecting patient data for local research use or national registries. In countries where informed consent is required even for anonymised observational data, PIs are responsible for obtaining ethics approval and informed consent in their country for the contribution of their anonymised data to the iPCD Cohort for research purposes. All centres are required to get informed consent for contribution of prospective data. In Switzerland, we received a registry permission from the Bern Cantonal Ethics Committee that permits to have a national PCD registry and to contribute pseudonymised data to international studies.

**Table S1. Standardised dataset structure of the iPCD cohort (REDCap)**

### Topic 1: General information

| Variable label  | Variable description      | Values                                                                                                                                                                                                                                                                                                                                                                                                                                                                                                                                                                                                                                                                      | Type        |
|-----------------|---------------------------|-----------------------------------------------------------------------------------------------------------------------------------------------------------------------------------------------------------------------------------------------------------------------------------------------------------------------------------------------------------------------------------------------------------------------------------------------------------------------------------------------------------------------------------------------------------------------------------------------------------------------------------------------------------------------------|-------------|
| <b>idpat</b>    | Unique patient identifier |                                                                                                                                                                                                                                                                                                                                                                                                                                                                                                                                                                                                                                                                             | Text        |
| <b>idfam</b>    | Identifier for family     |                                                                                                                                                                                                                                                                                                                                                                                                                                                                                                                                                                                                                                                                             | Text        |
| <b>idcent</b>   | Identifier for centre     | 0-12                                                                                                                                                                                                                                                                                                                                                                                                                                                                                                                                                                                                                                                                        | Numeric     |
| <b>dob</b>      | Patient's day of birth    | 1-31                                                                                                                                                                                                                                                                                                                                                                                                                                                                                                                                                                                                                                                                        | Numeric     |
| <b>mob</b>      | Patient's month of birth  | 1-12                                                                                                                                                                                                                                                                                                                                                                                                                                                                                                                                                                                                                                                                        | Numeric     |
| <b>yob</b>      | Patient's year of birth   | 1900-2014                                                                                                                                                                                                                                                                                                                                                                                                                                                                                                                                                                                                                                                                   | Numeric     |
| <b>sex</b>      | Sex of the patient        | 0=female<br>1=male                                                                                                                                                                                                                                                                                                                                                                                                                                                                                                                                                                                                                                                          | Categorical |
| <b>ethn</b>     | Patient's ethnicity       | 1=White/ European descent<br>2=Arab (for instance, Egypt, Iraq, Jordan, Lebanon)<br>3=West Asian (for instance, Turkey, Iran, Afghanistan)<br>4=Indian subcontinent<br>5=Pakistani/Bangladeshi<br>6=Southeast Asian (for instance, Malaysia, Indonesia, Vietnam)<br>7=East Asian (for instance, China, Japan, Korea, Taiwan)<br>8=African/ African American<br>9=Latin American/Hispanic<br>10=American Indian/ Alaska Native<br>11=Australian aboriginal<br>12=Native Hawaiian or other Pacific Islander<br>13=Caribbean<br>14=Jewish<br>15=Roma/ Irish traveler<br>16=Other ethnic group (not listed above)<br>17=Don't know<br>18=Prefer not to answer<br>19=Bangladeshi | Categorical |
| <b>ethn_oth</b> | If other please explain   |                                                                                                                                                                                                                                                                                                                                                                                                                                                                                                                                                                                                                                                                             | Text        |
| <b>vislast</b>  | Date of last follow up    | dd/mm/yyyy                                                                                                                                                                                                                                                                                                                                                                                                                                                                                                                                                                                                                                                                  | Date        |
| <b>alivlast</b> | Date last known alive     | dd/mm/yyyy                                                                                                                                                                                                                                                                                                                                                                                                                                                                                                                                                                                                                                                                  | Date        |

Table S1: Dataset structure of the iPCD cohort (REDCap)

## Topic 2: Diagnostic Evaluation

| Variable label    | Variable description                               | Values                                                                                                                                                                                                                                 | Type        |
|-------------------|----------------------------------------------------|----------------------------------------------------------------------------------------------------------------------------------------------------------------------------------------------------------------------------------------|-------------|
| <b>pcd_status</b> | Diagnostic status of PCD                           | 0=PCD excluded<br>1=definite PCD<br>2=PCD probable, positive HFVM, not all testing finalised<br>3= PCD probable, positive EM, not all testing finalised<br>4= mainly clinical diagnosis of PCD                                         | Categorical |
| <b>dd</b>         | Date of definite diagnosis of PCD                  | dd/mm/yyyy                                                                                                                                                                                                                             | Date        |
| <b>ddd</b>        | Date that this patient was first considered as PCD | dd/mm/yyyy                                                                                                                                                                                                                             | Date        |
| <b>no</b>         | nasalNO performed                                  | 0=no<br>1=yes<br>2=unknown                                                                                                                                                                                                             | Categorical |
| <b>no_dat</b>     | Date of nNO testing                                | dd/mm/yyyy                                                                                                                                                                                                                             | Date        |
| <b>no_res</b>     | nNO result (in ppb)                                | Valid numbers                                                                                                                                                                                                                          | Numeric     |
| <b>no_eq</b>      | Equipment used for nNO testing                     | 0=Ecomedics CLD 88 Exhalyzer<br>1= NIOX MINO<br>2=NIOX Flex<br>3=Other                                                                                                                                                                 | Categorical |
| <b>no_man</b>     | breathing maneuver                                 | 1=breath hold<br>2=exhalation against resist<br>3=humming<br>4=tidal breathing<br>5=other                                                                                                                                              | Categorical |
| <b>no_prrat</b>   | nNO production rate                                | valid numbers                                                                                                                                                                                                                          | Numeric     |
| <b>hfvm</b>       | HFVM performed                                     | 0=no<br>1=yes<br>2=unknown                                                                                                                                                                                                             | Categorical |
| <b>light_micr</b> | How was the measurement performed?                 | 1=with HFVM<br>2=with light microscopy<br>3= other                                                                                                                                                                                     | Categorical |
| <b>hfvm_dat</b>   | Date of HFVM testing                               | dd/mm/yyyy                                                                                                                                                                                                                             | Date        |
| <b>hfvm_fr</b>    | HFVM ciliary beating frequency                     | 0=decreased<br>1=increased<br>2=normal                                                                                                                                                                                                 | Categorical |
| <b>hfvm_pat</b>   | HFVM ciliary beating pattern                       | 0=regular power stroke and recovery stroke<br>1=almost immotile cilia<br>2=extremely stiff due to reduced ciliary bending<br>3=stiff beating pattern due to slight reduced amplitude<br>4=abnormal circular beating pattern<br>5=other | Categorical |
| <b>hfvm_con</b>   | HFVM conclusion                                    | 0=normal<br>1=abnormal<br>2=highly abnormal<br>3=inconclusive test                                                                                                                                                                     | categorical |
| <b>em</b>         | EM performed                                       | 0=no<br>1=yes<br>2=unknown                                                                                                                                                                                                             | Categorical |
| <b>em_dat</b>     | Date of EM testing                                 | dd/mm/yyyy                                                                                                                                                                                                                             | Date        |
| <b>em_res</b>     | EM result                                          | 0=normal<br>1=abnormal<br>2=unclear                                                                                                                                                                                                    | Categorical |
| <b>em_oda</b>     | Is there an ODA-defect                             | 0=no<br>1=yes<br>2=unclear                                                                                                                                                                                                             | Categorical |

## Topic 2: Diagnostic Evaluation (continued)

| Variable label       | Variable description                                                                                                     | Values                                                                                                                                                                                                                                                                                                                                       | Type        |
|----------------------|--------------------------------------------------------------------------------------------------------------------------|----------------------------------------------------------------------------------------------------------------------------------------------------------------------------------------------------------------------------------------------------------------------------------------------------------------------------------------------|-------------|
| <b>em_ida</b>        | Is there an IDA-defect?                                                                                                  | 0=no<br>1=yes<br>2=unclear                                                                                                                                                                                                                                                                                                                   | Categorical |
| <b>em_cpd</b>        | Is there a central pair defect (9+0)?                                                                                    | 0=no<br>1=yes<br>2=unclear                                                                                                                                                                                                                                                                                                                   | Categorical |
| <b>em_dis</b>        | Is there a tubulus disorganisation defect with IDA defect?                                                               | 0=no<br>1=yes<br>2=unclear                                                                                                                                                                                                                                                                                                                   | Categorical |
| <b>em_tutr</b>       | Is there a tubular transposition defect (8+1)?                                                                           | 0=no<br>1=yes<br>2=unclear                                                                                                                                                                                                                                                                                                                   | Categorical |
| <b>em_nex</b>        | Is there a nexin link defect?                                                                                            | 0=no<br>1=yes<br>2=unclear                                                                                                                                                                                                                                                                                                                   | Categorical |
| <b>em_acil</b>       | Are there no cilia present (acilia)?                                                                                     | 0=no<br>1=yes<br>2=unclear                                                                                                                                                                                                                                                                                                                   | Categorical |
| <b>gene</b>          | Genetic testing performed                                                                                                | 0=no<br>1=yes<br>2=unknown                                                                                                                                                                                                                                                                                                                   | Categorical |
| <b>gene_dat</b>      | Date of genetic testing                                                                                                  | dd/mm/yyyy                                                                                                                                                                                                                                                                                                                                   | Date        |
| <b>gene_res</b>      | Genetic testing result                                                                                                   | 1=ARMC4<br>2=C21ORF59<br>3=CCDC103<br>4=CCDC114<br>5=CCDC164<br>6=CCDC39<br>7=CCDC40<br>8=CCDC65<br>9=CCNO<br>10=DNAAF3<br>11=DNAH11<br>12=DNAH5<br>13=DNAI1<br>14=DNAI2<br>15=DNAL1<br>16=DYX1C1<br>17=LRRCS0<br>18=RSPH1<br>19=RSPH9<br>20=SPAG1<br>21=TXNDC3<br>22=ZBBX<br>23=ZMYND10<br>24=other<br>25=Negative<br>26=Waiting for result | Categorical |
| <b>gene_res_oth</b>  | If other, please explain                                                                                                 |                                                                                                                                                                                                                                                                                                                                              | Text        |
| <b>diagn_comment</b> | Add any comments relevant for PCD diagnosis<br><i>For example positive IF results, multiple positive HFVM tests, etc</i> |                                                                                                                                                                                                                                                                                                                                              | Text        |

### Topic 3: Baseline clinical characteristics

| Variable label      | Variable description                                                                      | Values                                                                   | Type        |
|---------------------|-------------------------------------------------------------------------------------------|--------------------------------------------------------------------------|-------------|
| <b>situs</b>        | Does the patient have any situs anomalies?                                                | 0=no<br>1=situs inversus<br>2=heterotaxia<br>3=unknown                   | Categorical |
| <b>chd</b>          | Does the patient have a congenital heart defect?                                          | 0=no<br>1=yes<br>2=unknown                                               | Categorical |
| <b>chd_typ</b>      | Type of congenital heart defect                                                           |                                                                          | Text        |
| <b>braincil</b>     | Did the patient at any stage had any type of brain cilia dysfunction (e.g hydrocephalus)? | 0=no<br>1=yes<br>2=unknown                                               | Categorical |
| <b>braincil_typ</b> | Type of brain cilia dysfunction                                                           |                                                                          | Text        |
| <b>retin</b>        | Does the patient have retinitis pigmentosa?                                               | 0=no<br>1=yes<br>2=unknown                                               | Categorical |
| <b>renal</b>        | Does the patient have any renal problems?                                                 | 0=no<br>1=yes<br>2=unknown                                               | Categorical |
| <b>infert</b>       | Does the patient have fertility problems?                                                 | 0=no<br>1=subfertility<br>2=infertility<br>3=unknown<br>4=not applicable | Categorical |
| <b>infert_d</b>     | Date when fertility was evaluated                                                         | dd/mm/yyyy                                                               | Date        |
| <b>semen_anal</b>   | semen analysis results                                                                    | 0=abnormal<br>1=normal<br>2=not performed                                | categorical |
| <b>child_n</b>      | Number of children                                                                        | valid number                                                             | Numerical   |
| <b>assist_rep</b>   | <i>if child_n ≥ 1, were assisted reproduction methods used</i>                            | 0=no<br>1=yes<br>2=unknown                                               | categorical |
| <b>comorb</b>       | Does the patient have any relevant comorbidities not connected with PCD?                  | 0=no<br>1=yes                                                            | Categorical |
| <b>comorb_com</b>   | If yes, please comment                                                                    |                                                                          |             |

#### Topic 4: Lung Function & somatometric values

| Variable label           | Variable description                  | Values                     | Type        |
|--------------------------|---------------------------------------|----------------------------|-------------|
| <b>lufu_d</b>            | Lung function date                    | dd/mm/yyyy                 | Date        |
| <b>weight</b>            | Patient's weight in kg                | valid numbers              | Numerical   |
| <b>height</b>            | Patient's height in cm                | valid numbers              | Numerical   |
| <b>lufu_FVC_pre</b>      | FVC pre bronchodilation               | valid numbers              | Numerical   |
| <b>lufu_FEV1_pre</b>     | FEV1 pre bronchodilation              | valid numbers              | Numerical   |
| <b>lufu_PEFR_pre</b>     | PEFR pre bronchodilation              | valid numbers              | Numerical   |
| <b>lufu_FEF50_pre</b>    | FEF50 pre bronchodilation             | valid numbers              | Numerical   |
| <b>lufu_FEF2575_pre</b>  | FEF25-75 pre bronchodilation          | valid numbers              | Numerical   |
| <b>lufu_TLC_pre</b>      | TLC pre bronchodilation               | valid numbers              | Numerical   |
| <b>lufu_RV_pre</b>       | RV pre bronchodilation                | valid numbers              | Numerical   |
| <b>lufu_FRC_pre</b>      | FRC pre bronchodilation               | valid numbers              | Numerical   |
| <b>lufu_FVC_post</b>     | FVC post bronchodilation              | valid numbers              | Numerical   |
| <b>lufu_FEV1_post</b>    | FEV1 post bronchodilation             | valid numbers              | Numerical   |
| <b>lufu_PEFR_post</b>    | PEFR post bronchodilation             | valid numbers              | Numerical   |
| <b>lufu_FEF50_post</b>   | FEF50 post bronchodilation            | valid numbers              | Numerical   |
| <b>lufu_FEF2575_post</b> | FEF25-75 post bronchodilation         | valid numbers              | Numerical   |
| <b>lufu_TLC_post</b>     | TLC post bronchodilation              | valid numbers              | Numerical   |
| <b>lufu_RV_post</b>      | RV post bronchodilation               | valid numbers              | Numerical   |
| <b>lufu_FRC_post</b>     | FRC post bronchodilation              | valid numbers              | Numerical   |
| <b>lufu_RV_post</b>      | RV post bronchodilation               | valid numbers              | Numerical   |
| <b>mbw</b>               | Was MBW performed?                    | 0=no<br>1=yes<br>2=unknown | Categorical |
| <b>mbw_dev</b>           | Which MBW device was used?            |                            | Text        |
| <b>mbw_gas</b>           | What type of trace gas was used?      |                            | Text        |
| <b>lufu_LCI_pre</b>      | LCI pre bronchodilation               | valid numbers              | Numerical   |
| <b>lufu_frc_mbw_pre</b>  | FRC (in MBW) pre bronchodilation in L | valid numbers              | Numerical   |
| <b>lufu_LCI_post</b>     | LCI post bronchodilation              | valid numbers              | Numerical   |
| <b>lufu_frc_mbw_post</b> | FRC (in MBW) pro bronchodilation in L | valid numbers              | Numerical   |

## Topic 5: Clinical manifestations (signs and symptoms)

| Variable label    | Variable description                                                           | Values                     | Type        |
|-------------------|--------------------------------------------------------------------------------|----------------------------|-------------|
| <b>clinic_d</b>   | Date of the clinical visit                                                     | dd/mm/yyyy                 | Date        |
| <b>cough</b>      | Did the patient have cough at visit or during the last 3 months?               | 0=no<br>1=yes<br>2=unknown | Categorical |
| <b>ccough</b>     | Did the patient have chronic or frequent cough during the last 3 months?       | 0=no<br>1=yes<br>2=unknown | Categorical |
| <b>ccough_def</b> | How do you define chronic cough?                                               |                            | Text        |
| <b>sput</b>       | Did the patient have sputum at visit or during the last 3 months?              | 0=no<br>1=yes<br>2=unknown | Categorical |
| <b>hemoptys</b>   | Did the patient have hemoptysis at visit or during the last 3 months?          | 0=no<br>1=yes<br>2=unknown | Categorical |
| <b>wheez</b>      | Did the patient have wheezing at visit or during the last 3 months?            | 0=no<br>1=yes<br>2=unknown | Categorical |
| <b>pneum</b>      | Does the patient have pneumonia at visit or during the last 3 months?          | 0=no<br>1=yes<br>2=unknown | Categorical |
| <b>pneumoth</b>   | Did the patient have pneumothorax during the last 3 months?                    | 0=no<br>1=yes<br>2=unknown | Categorical |
| <b>rhin</b>       | Did the patient have rhinorrhea/rhinitis at visit or during the last 3 months? | 0=no<br>1=yes<br>2=unknown | Categorical |
| <b>otit</b>       | Did the patient have otitis media at visit or during the last 3 months?        | 0=no<br>1=yes<br>2=unknown | Categorical |
| <b>sin</b>        | Did the patient have sinusitis at visit or during the last 3 months?           | 0=no<br>1=yes<br>2=unknown | Categorical |
| <b>hearl</b>      | Did the patient have hearing impairment?                                       | 0=no<br>1=yes<br>2=unknown | Categorical |
| <b>audiom</b>     | if yes what are the audiometry findings                                        |                            | Text        |
| <b>glue</b>       | Did the patient have glue ear at visit?                                        | 0=no<br>1=yes<br>2=unknown | Categorical |
| <b>tymperf</b>    | Did the patient have tympanic perforation at visit?                            | 0=no<br>1=yes<br>2=unknown | Categorical |
| <b>pol</b>        | Did the patient have nasal polyps at visit?                                    | 0=no<br>1=yes<br>2=unknown | Categorical |
| <b>club</b>       | Did the patient have clubbing at visit?                                        | 0=no<br>1=yes<br>2=unknown | Categorical |
| <b>reflux</b>     | Did the patient have gastroesophageal reflux during the last 3 months?         | 0=no<br>1=yes<br>2=unknown | Categorical |

## Topic 5: Clinical manifestations (signs and symptoms/ continued)

| Variable label      | Variable description                                                       | Values                                                                          | Type        |
|---------------------|----------------------------------------------------------------------------|---------------------------------------------------------------------------------|-------------|
| <b>exerc</b>        | Did the patient have exercise limitation during the last 3 months?         | 0=no<br>1=minor exercise limitation<br>2=major exercise limitation<br>3=unknown | Categorical |
| <b>act_smok</b>     | Was the patient a smoker at the time of visit or during the last 3 months? | 0=no<br>1=yes<br>2=unknown                                                      | Categorical |
| <b>act_smok_cig</b> | if yes how many cigarettes did he/she smoke per day?                       | Valid numbers                                                                   | Numerical   |
| <b>pas_smok</b>     | Is the patient exposed to passive smoking in the household?                | 0=no<br>1=yes<br>2=unknown                                                      | Categorical |
| <b>pas_smok_det</b> | if yes who is smoking in the household?                                    | 0=mother<br>1=father<br>2=both<br>3=other                                       | Categorical |

## Topic 6: Therapy

| Variable label                   | Variable description                                                          | Values                                                                   | Type        |
|----------------------------------|-------------------------------------------------------------------------------|--------------------------------------------------------------------------|-------------|
| <b>ther_d</b>                    | Date when medication was prescribed                                           | dd/mm/yyyy                                                               | Date        |
| <b><u>inhaled medication</u></b> |                                                                               |                                                                          |             |
| <b>nacl</b>                      | Was NaCl 0.9% prescribed?                                                     | 0=no<br>1=yes                                                            | Categorical |
| <b>hyp_nacl</b>                  | Was hypertonic NaCl prescribed?                                               | 0=no<br>1=yes                                                            | Categorical |
| <b>hyp_nacl_conc</b>             | If yes in what concentration?                                                 | 1=3%<br>2=6%<br>3=other                                                  | Categorical |
| <b>hyp_nacl_oth</b>              | If other please specify with text                                             |                                                                          | Text        |
| <b>b2sh_bro</b>                  | Was a $\beta$ 2 short-acting bronchodilator prescribed?                       | 0=no<br>1=yes                                                            | Categorical |
| <b>b2l_bro</b>                   | Was a $\beta$ 2 long-acting bronchodilator prescribed?                        | 0=no<br>1=yes                                                            | Categorical |
| <b>sh_musc</b>                   | Was a short-acting muscarinic antagonist prescribed?                          | 0=no<br>1=yes                                                            | Categorical |
| <b>l_musc</b>                    | Was a long-acting muscarinic antagonist prescribed?                           | 0=no<br>1=yes                                                            | Categorical |
| <b>ICS</b>                       | Was an inhaled corticosteroid prescribed?                                     | 0=no<br>1=yes                                                            | Categorical |
| <b>bronc_ICS</b>                 | Was a bronchodilator and steroid combination prescribed?                      | 0=no<br>1=yes                                                            | Categorical |
| <b>inh_oth</b>                   | Was any other inhaled medication prescribed?                                  | 0=no<br>1=yes                                                            | Categorical |
| <b><u>nasal medication</u></b>   |                                                                               |                                                                          |             |
| <b>nas_ster</b>                  | Was any nasal steroid prescribed?                                             | 0=no<br>1=yes                                                            | Categorical |
| <b>nas_oth</b>                   | Was any other nasal spray prescribed?                                         | 0=no<br>1=yes                                                            | Categorical |
| <b>nas_med_typ</b>               | If yes what type of nasal medication was prescribed?                          | 1=NaCl lavage<br>2=NaCl spray<br>3=antihistamine nasal spray<br>4= other | Categorical |
| <b>nas_oth_typ</b>               | If other please specify with text                                             |                                                                          | Text        |
| <b><u>antibiotics</u></b>        |                                                                               |                                                                          |             |
| <b>antib</b>                     | Were any antibiotics prescribed?                                              | 0=no<br>1=yes                                                            | Categorical |
| <b>antib_dur</b>                 | If yes was it prescribed as prophylactic treatment or for an acute infection? | 1=acute<br>2=prophylactic<br>3=unknown                                   | Categorical |
| <b>antib_rout</b>                | If yes give route of antibiotic administration                                | 1=per os<br>2=intravenous<br>3=inhaled<br>4=intramuscular<br>5=other     | Categorical |
| <b>antib_typ</b>                 | if yes which antibiotic                                                       |                                                                          | Text        |



---

**Topic 6: Therapy (continued)**

---

| <b>Variable label</b> | <b>Variable description</b>        | <b>Values</b>                                                                                                                                                                                                                                                                            | <b>Type</b> |
|-----------------------|------------------------------------|------------------------------------------------------------------------------------------------------------------------------------------------------------------------------------------------------------------------------------------------------------------------------------------|-------------|
| <b>oxyg_ther</b>      | Was oxygen therapy prescribed?     | 0=no<br>1=yes                                                                                                                                                                                                                                                                            | Categorical |
| <b>oxyg_th_typ</b>    | Was it continuous or intermittent? | 1=continuous<br>2=intermittent<br>3=unknown                                                                                                                                                                                                                                              | Categorical |
| <b>mech_vent_typ</b>  | Was it invasive or non-invasive?   | 1=invasive<br>2=non-invasive<br>3=unknown                                                                                                                                                                                                                                                | Categorical |
| <b>physio</b>         | Was physiotherapy prescribed?      | 0=no<br>1=yes                                                                                                                                                                                                                                                                            | Categorical |
| <b>physio_typ</b>     | What type of physiotherapy?        | 1=airway clearance therapy postural drainage and percussion<br>2=autogenic Drainage<br>3=positive expiratory pressure (PEP)<br>4=Active-cycle of breathing technique (ACBT)<br>5=Ocsillatory PEP (OPEP)<br>6=high-frequency chest compression (HFCC)<br>7=exercise training<br>8=unknown | Categorical |

---

## Topic 7: Microbiological findings

| Variable label       | Variable description                   | Values                                                                                                                                                                                                                                                                                                                                                | Type        |
|----------------------|----------------------------------------|-------------------------------------------------------------------------------------------------------------------------------------------------------------------------------------------------------------------------------------------------------------------------------------------------------------------------------------------------------|-------------|
| <b>micr_d</b>        | Date of microbiology examination       |                                                                                                                                                                                                                                                                                                                                                       | Date        |
| <b>micr_sampl</b>    | Sample taken for microbiology analysis | 1=sputum<br>2=throat swab<br>3=cough swab<br>4=laryngeal swab<br>5=nasal swab<br>6=nasal lavage<br>7=BAL<br>8=ear swab                                                                                                                                                                                                                                | Categorical |
| <b>micr_res</b>      | First microorganism isolated           | 0=Aspergillus Fumigatus<br>1=Candida species<br>2=Branhamella/M.catarrhalis<br>3=Burkholderia species<br>4=Enterobacter species<br>5=Enterococcus species<br>6=E.coli<br>7=H.Influenza<br>8=Klebsiella species<br>9=Ps.aeruginosa<br>10=St.maltophilia<br>11=S.pneumoniae<br>12=S.pyogenes(A)<br>13=S.aureus (MSSA)<br>14=S.aureus (MRSA)<br>15=Other | Categorical |
| <b>micr_res_oth</b>  | If other please specify with text      |                                                                                                                                                                                                                                                                                                                                                       | Text        |
| <b>micr_res2</b>     | Second bacterium isolated              | see values right above                                                                                                                                                                                                                                                                                                                                | Categorical |
| <b>micr_res2_oth</b> | If other please specify with text      |                                                                                                                                                                                                                                                                                                                                                       | Text        |

## Topic 8: Imaging

| Variable label      | Variable description                                     | Values                                                                                                                                                                        | Type                              |
|---------------------|----------------------------------------------------------|-------------------------------------------------------------------------------------------------------------------------------------------------------------------------------|-----------------------------------|
| <b>imagch_d</b>     | Date when chest imaging examination was performed        | dd/mm/yyyy                                                                                                                                                                    | Date                              |
| <b>imagch_typ</b>   | Type of chest imaging                                    | 0=x-ray<br>1=CT<br>2=MRI                                                                                                                                                      | Categorical                       |
| <b>imag_bronc</b>   | Were bronchiectases present?                             | 0=no<br>1=yes<br>2=unknown                                                                                                                                                    | Categorical                       |
| <b>bronc_loc</b>    | if yes where were they located?                          | 1=right upper lobe<br>2=right middle lobe<br>3=right lower lobe<br>4=left upper lobe<br>5=left middle lobe (in case of situs abnormalities)<br>6=left lower lobe<br>7=unknown | Categorical<br>multiple tick list |
| <b>imag_atelect</b> | Were atelectases present?                                | 0=no<br>1=yes<br>2=unknown                                                                                                                                                    | Categorical                       |
| <b>atelect_loc</b>  | if yes where were they located?                          | 1=right upper lobe<br>2=right middle lobe<br>3=right lower lobe<br>4=left upper lobe<br>5=left middle lobe (in case of situs abnormalities)<br>6=left lower lobe<br>7=unknown | Categorical<br>multiple tick list |
| <b>imag_infiltr</b> | Were infiltrations present??                             | 0=no<br>1=yes<br>2=unknown                                                                                                                                                    | Categorical                       |
| <b>infiltr_loc</b>  | if yes where were they located?                          | 1=right upper lobe<br>2=right middle lobe<br>3=right lower lobe<br>4=left upper lobe<br>5=left middle lobe (in case of situs abnormalities)<br>6=left lower lobe<br>7=unknown | Categorical<br>multiple tick list |
| <b>imag_sin</b>     | Did the patient have any sinus imaging?                  | 0=no<br>1=yes<br>2=unknown                                                                                                                                                    | Categorical                       |
| <b>imag_abdom</b>   | Did the patient have any abdominal system imaging?       | 0=no<br>1=yes<br>2=unknown                                                                                                                                                    | Categorical                       |
| <b>imag_cns</b>     | Did the patient have any central nervous system imaging? | 0=no<br>1=yes<br>2=unknown                                                                                                                                                    | Categorical                       |
| <b>imag_card</b>    | Did the patient have any cardiac system imaging?         | 0=no<br>1=yes<br>2=unknown                                                                                                                                                    | Categorical                       |

## Topic 9: Surgical/Other interventions

---

| Variable label        | Variable description                                                                                  | Values                                                                                                                                               | Type        |
|-----------------------|-------------------------------------------------------------------------------------------------------|------------------------------------------------------------------------------------------------------------------------------------------------------|-------------|
| <b>surg_d</b>         | Date when lung surgery was performed                                                                  | dd/mm/yyyy                                                                                                                                           | Date        |
| <b>lungsurg_typ</b>   | If yes what type of lung surgery?                                                                     | 1=lobectomy<br>2=lung transplantation<br>3=other                                                                                                     | Categorical |
| <b>lungsurg_typ_t</b> | If other please specify                                                                               |                                                                                                                                                      | Text        |
| <b>othsurg_typ</b>    | If other type of surgery/intervention relevant to PCD was performed what type of intervention was it? | 1=tympanostomy tube placement (grommets)<br>2=adenotomy<br>3=sinus surgery<br>4=mastoidectomy<br>5=polypectomy<br>6=hearing aid placement<br>7=other | Categorical |

---

**Topic 10: Neonatal period (clinical manifestations and interventions during the first month of life)**

| Variable label | Variable description                                         | Values                     | Type        |
|----------------|--------------------------------------------------------------|----------------------------|-------------|
| neo_RDS        | Did the neonate have neonatal respiratory distress syndrome? | 0=no<br>1=yes<br>2=unknown | Categorical |
| neo_cough      | Did the neonate have neonatal cough?                         | 0=no<br>1=yes<br>2=unknown | Categorical |
| neo_rhin       | Did the neonate have neonatal rhinitis?                      | 0=no<br>1=yes<br>2=unknown | Categorical |
| neo_pneum      | Did the neonate have neonatal pneumonia?                     | 0=no<br>1=yes<br>2=unknown | Categorical |
| neo_hydroc     | Did the neonate have neonatal hydrocephalus?                 | 0=no<br>1=yes<br>2=unknown | Categorical |
| gest_ag        | Gestational age                                              | 15-45                      | Numerical   |
| neo_icu        | Was the neonate admitted in neonatal intensive care unit?    | 0=no<br>1=yes<br>2=unknown | Categorical |
| neo_ox         | Was any oxygen given to the neonate?                         | 0=no<br>1=yes<br>2=unknown | Categorical |
| neo_ninv_vent  | Was the neonate ventilated non-invasively?                   | 0=no<br>1=yes<br>2=unknown | Categorical |
| neo_inv_vent   | Was the neonate ventilated invasively?                       | 0=no<br>1=yes<br>2=unknown | Categorical |

## Topic 11: Family History

| Variable label       | Variable description                                                                   | Values                                      | Type        |
|----------------------|----------------------------------------------------------------------------------------|---------------------------------------------|-------------|
| <b>sibl_n</b>        | Total number of siblings of the patient                                                | valid numbers                               | Numeric     |
| <b>pcd_sibl_n</b>    | Number of PCD affected siblings                                                        | valid numbers                               | Numeric     |
| <b>pcd_fam_n</b>     | Number of other PCD affected family members                                            | valid numbers                               | Numeric     |
| <b>relat_typ</b>     | What kind of relationship does the patient have with the other affected family member? | 1=father<br>2=mother<br>3=cousin<br>4=other | Categorical |
| <b>relat_typ_oth</b> | If other, please write as text                                                         |                                             | Text        |
| <b>idpat_fam</b>     | Patient ID of PCD affected family member                                               | valid numbers                               | Numeric     |
